# Supplementary material for: Prognostic Value of Decreased High-Density Lipoprotein Cholesterol Levels in Infective Endocarditis
Source: MDPI journal article supplement (doi:10.3390/jcm11040957), 2022-02-12
Supplement: s1 [file s1]

| <b>Etiology</b>                         | <b>Discharged alive</b> | <b>Deceased</b> | <b>p value</b> |
|-----------------------------------------|-------------------------|-----------------|----------------|
| <i>Staphylococcus aureus</i>            | 21                      | 4               | 0.449          |
| <i>Coagulase-negative Staphylococci</i> | 24                      | 6               |                |
| <i>Streptococcus spp</i>                | 24                      | 1               |                |
| <i>Enterococcus spp.</i>                | 20                      | 2               |                |
| <i>Other</i>                            | 8                       | 1               |                |
| <i>Streptococcus gallolyticus</i>       | 13                      | 1               |                |
| <i>Streptococcus mitis</i>              | 1                       | 0               |                |
| <i>Streptococcus gordonii</i>           | 3                       | 0               |                |
| <i>Streptococcus salivarius</i>         | 1                       | 0               |                |
| <i>Streptococcus viridans</i>           | 1                       | 0               |                |
| <i>Streptococcus sanguinis</i>          | 1                       | 0               |                |
| <i>Streptococcus agalactiae</i>         | 2                       | 0               |                |
| <i>Streptococcus mutans</i>             | 2                       | 0               |                |

**Supplementary Table S1.** In-hospital mortality according with different etiological agent of IE and in particular specific *Streptococcus* species.

Univariate Analysis

| Cardiac surgery                        |                      |                    |       |
|----------------------------------------|----------------------|--------------------|-------|
| Parameter                              | Yes (n=79)           | No (n=43)          | P     |
| Cholesterol, (mg/dl), median [IQR]     |                      |                    |       |
| <i>Total</i>                           | 132 [92 – 169]       | 117 [103 – 151]    | 0.832 |
| <i>HDL</i>                             | 29 [20 – 38]         | 26 [19 – 37]       | 0.554 |
| <i>LDL</i>                             | 70.2 [41.2 – 98.2]   | 68.8 [55.6 – 90.2] | 0.556 |
| Triglycerides, (mg/dl), median [IQR]   | 118.5 [95.7 – 188]   | 121 [91 – 142]     | 0.312 |
| Embolism                               |                      |                    |       |
| Parameter                              | Yes (n=32)           | No (n=95)          | P     |
| Cholesterol, (mg/dl), median [IQR]     |                      |                    |       |
| <i>Total</i>                           | 140.5 [99.2 – 163.7] | 121 [97 – 162]     | 0.683 |
| <i>HDL</i>                             | 24.5 [13 – 34.2]     | 30 [21 – 38]       | 0.036 |
| <i>LDL</i>                             | 82.2 [52 – 99.1]     | 68.6 [42.4 – 95.3] | 0.495 |
| Triglycerides, (mg/dl), median [IQR]   | 135 [106 – 167.2]    | 116 [89 – 156.7]   | 0.151 |
| CRP, (mg/dl), median [IQR]             | 11.5 [7.3 – 17.8]    | 6.35 [2.8 – 12.8]  | 0.040 |
| HDL-C <24.5 mg/dl + CRP >median, N (%) | 14 (43.7%)           | 16 (17%)           | 0.008 |

Data are expressed as number and percentage or median and interquartile range (IQR)

IQR, interquartile range; HDL, high density lipoprotein; LDL, low density lipoprotein; CRP, C-reactive protein

**Supplementary Table S2.** Lipid levels according to performance of cardiac surgery and occurrence of embolic events

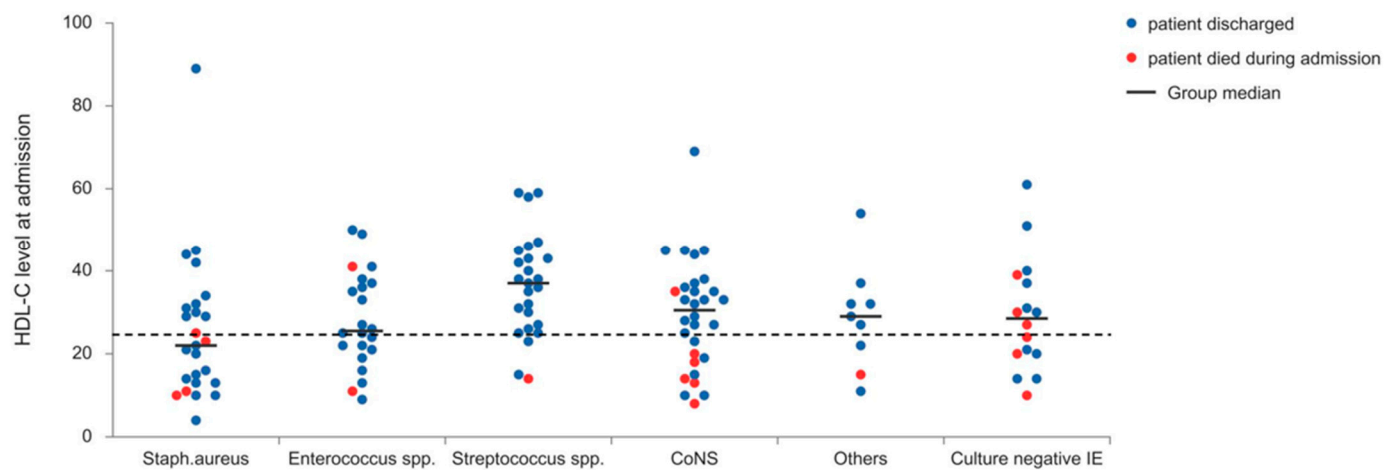

**Supplementary figure S1.** HDL-Cholesterol levels at admission in patient with *Staph aureus*, *Enterococcus* spp., *Streptococcus* spp., Coagulase negative *Staphylococci*, other infective endocarditis pathogens and culture negative IE patients; in blue patients discharged alive, in red patients died during admission; the dashed line represents the HDL-C cut-off of 24.5 mg/dl. CoNS, Coagulase-Negative *Staphylococci*; HDL-C, High Density Lipoprotein-Cholesterol; IE, infective endocarditis.
